# Supplementary material for: Cortical localization of the Gα protein GPA-16 requires RIC-8 function duringC. elegansasymmetric cell division
Source: Oxford University Press journal article supplement (doi:10.1242/dev.02039), 2005-09-15
Supplement: dev02039supptable1.pdf [file dev02039supptable1.pdf]

**Table S1. Spindle severing experiments**

| Genotype                                     | <i>n</i> | Anterior ( $\mu\text{m}/\text{second}$ ) | Posterior ( $\mu\text{m}/\text{second}$ ) | Student's <i>t</i> -test versus <i>gpb-1(RNAi)</i> |                               |
|----------------------------------------------|----------|------------------------------------------|-------------------------------------------|----------------------------------------------------|-------------------------------|
|                                              |          |                                          |                                           | (Anterior)                                         | (Posterior)                   |
| Wild type                                    | 13       | 0.64±0.07* <sup>†</sup>                  | 1.03±0.08* <sup>†</sup>                   | <i>P</i> <0.02                                     | <i>P</i> <0.2                 |
| <i>goa-1/gpa16(RNAi)</i>                     | 15       | 0.21±0.04 <sup>‡</sup>                   | 0.22±0.03 <sup>‡</sup>                    | <i>P</i> <0.001 <sup>‡</sup>                       | <i>P</i> <0.0011 <sup>‡</sup> |
| <i>goa-1(sa734)</i>                          | 12       | 0.60±0.08*                               | 0.73±0.09*                                | <i>P</i> <0.001                                    | <i>P</i> <0.02                |
| <i>goa-1(RNAi)</i>                           | 8        | 0.50±0.09                                | 0.80±0.12                                 | <i>P</i> <0.001                                    | <i>P</i> <0.05                |
| <i>gpa-16(it143)</i>                         | 10       | 0.58±0.07                                | 0.65±0.09                                 | <i>P</i> <0.001                                    | <i>P</i> <0.02                |
| <i>gpa-16(RNAi)</i>                          | 15       | 0.6±0.07*                                | 0.65±0.07*                                | <i>P</i> <0.001                                    | <i>P</i> <0.001               |
| <i>gpb-1(RNAi)</i>                           | 11       | 0.96±0.08*                               | 0.97±0.23* <sup>§</sup>                   | –                                                  | –                             |
| <i>goa-1(sa734) gpb-1(RNAi)</i>              | 11       | 0.95±0.087                               | 0.94±0.11 <sup>§</sup>                    | <i>P</i> >0.2                                      | <i>P</i> >0.2                 |
| <i>goa-1(RNAi) gpb-1(RNAi)</i>               | 10       | 0.94±0.07                                | 0.90±0.1 <sup>§</sup>                     | <i>P</i> >0.2                                      | <i>P</i> >0.2                 |
| <i>gpa-16(it143) gpb-1(RNAi)</i>             | 10       | 1.01±0.18                                | 1.1±0.12 <sup>§</sup>                     | <i>P</i> >0.2                                      | <i>P</i> >0.2                 |
| <i>gpa-16(RNAi) gpb-1(RNAi)</i>              | 11       | 0.95±0.13                                | 0.9±0.13 <sup>§</sup>                     | <i>P</i> >0.2                                      | <i>P</i> >0.2                 |
| <i>goa-1(sa732) gpa-16(RNAi) gpb-1(RNAi)</i> | 9        | 0.18±0.04                                | 0.22±0.07                                 | <i>P</i> <0.001                                    | <i>P</i> <0.001               |

Average peak velocities±s.d. were estimated as described in the Materials and methods for the anterior and posterior spindle poles.

\*Afshar et al., 2004.

<sup>†</sup>The spindle of wild-type embryos (*n*=9) were severed in this series of experiments, and the values obtained were statistically indistinguishable from those reported in Afshar et al. (*P*>0.2).

<sup>‡</sup>Colombo et al., 2003.

<sup>§</sup>The extent of the net pulling forces on the posterior spindle pole are probably underestimated as the mitotic spindle sets up more toward the posterior (see Movies 1-7); as a result, peak velocities on the posterior spindle pole probably cannot be fully developed.
